# Supplementary material for: Injectable OPF/graphene oxide hydrogels provide mechanical support and enhance cell electrical signaling after implantation into myocardial infarct
Source: PubMed Central journal article supplement — Theranostics. 2018 May 12;8(12):3317–30. doi: 10.7150/thno.25504 (PMC6010993; doi:10.7150/thno.25504), 2018-05-12
Supplement: thnov08p3317s1.pdf [file thnov08p3317s1.pdf]

**Injectable OPF/graphene oxide hydrogels provide mechanical support and enhance cell electrical signaling after implantation into myocardial infarct**

Jin Zhou<sup>1,†</sup>, Xiaoning Yang<sup>1,†</sup>, Wei Liu<sup>1</sup>, Chunlan Wang<sup>1</sup>, Yuan Shen<sup>1</sup>, Fengzhi Zhang<sup>1</sup>, Huimin Zhu<sup>1</sup>, Hongji Sun<sup>1</sup>, Jiayun Chen<sup>3</sup>, Johnny Lam<sup>2</sup>, Antonios G. Mikos<sup>2</sup>, Changyong Wang<sup>1,\*</sup>

<sup>1</sup> Tissue Engineering Research Center, Academy of Military Medical Sciences and Department of Neural Engineering and Biological Interdisciplinary Studies, Institute of Military Cognition and Brain Sciences, Academy of Military Medical Sciences, Beijing, China

<sup>2</sup> Rice University, Department of Bioengineering, Houston, Texas, USA

<sup>3</sup> Collage of Life Science and Technology, Huazhong Agricultural University, Wuhan, Hubei, China

*† These authors contributed equally*

*\* For correspondence*

Address for correspondence:

27 Taiping Road, Beijing 100850, PR China. wcy2000\_te@yahoo.com (Changyong Wang).

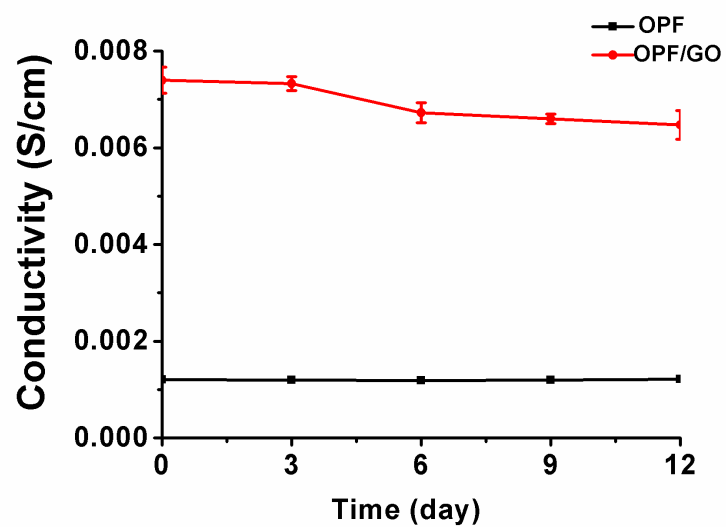

**Figure S1.** The time-dependent measurement of the electrical conductivity of OPF (black line) and OPF/GO (red line) hydrogel. (n=3/group)

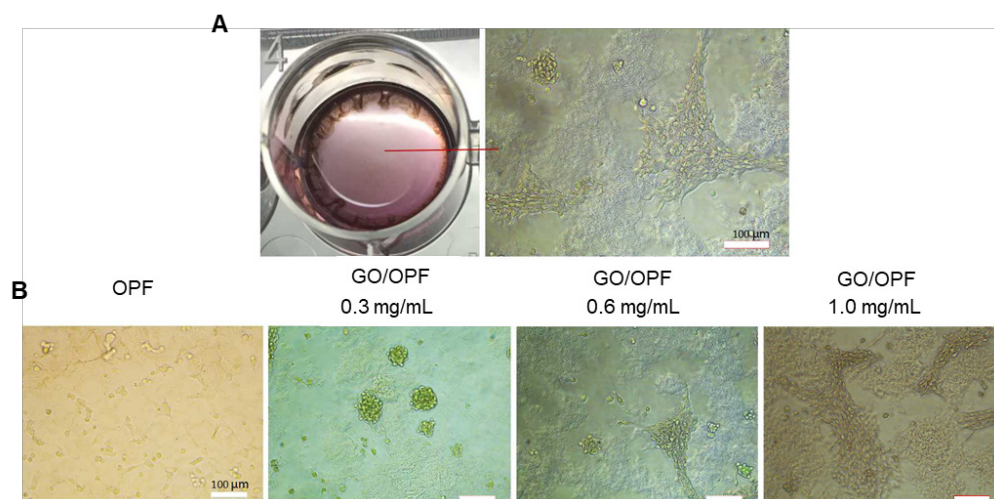

**Figure S2. OPF/GO hydrogel supports cell growth *in vitro*.**

A. Cardiac fibroblasts were seeded on the surface of OPF/GO hydrogels coated wells. B. Representative morphological images of cardiac fibroblasts cells cultured for 48 h on OPF or different composited OPF/GO (0.3 mg/mL, 0.6 mg/mL, 1.0 mg/mL) coated substrates.

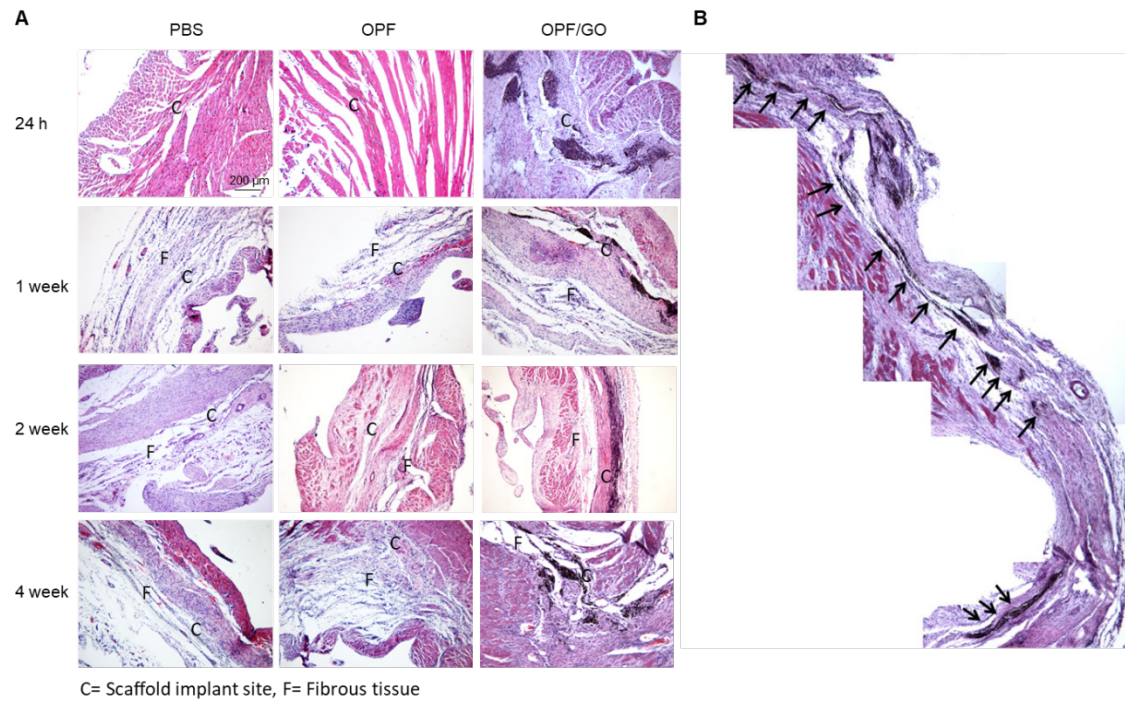

**Figure S3. Micrographs of rat infarcted tissue in the left ventricular responses to PBS, OPF and OPF/GO after different implantation time.**

A. Micrographs of infarcted tissue in the left ventricular response to PBS, OPF and OPF/GO after different implantation times. OPF/GO hydrogel can be seen in the scar and border zone. B. The maintenance and continuous distribution of OPF/GO along infarcted region. \* $p < 0.05$ , or \*\* $p < 0.01$ .

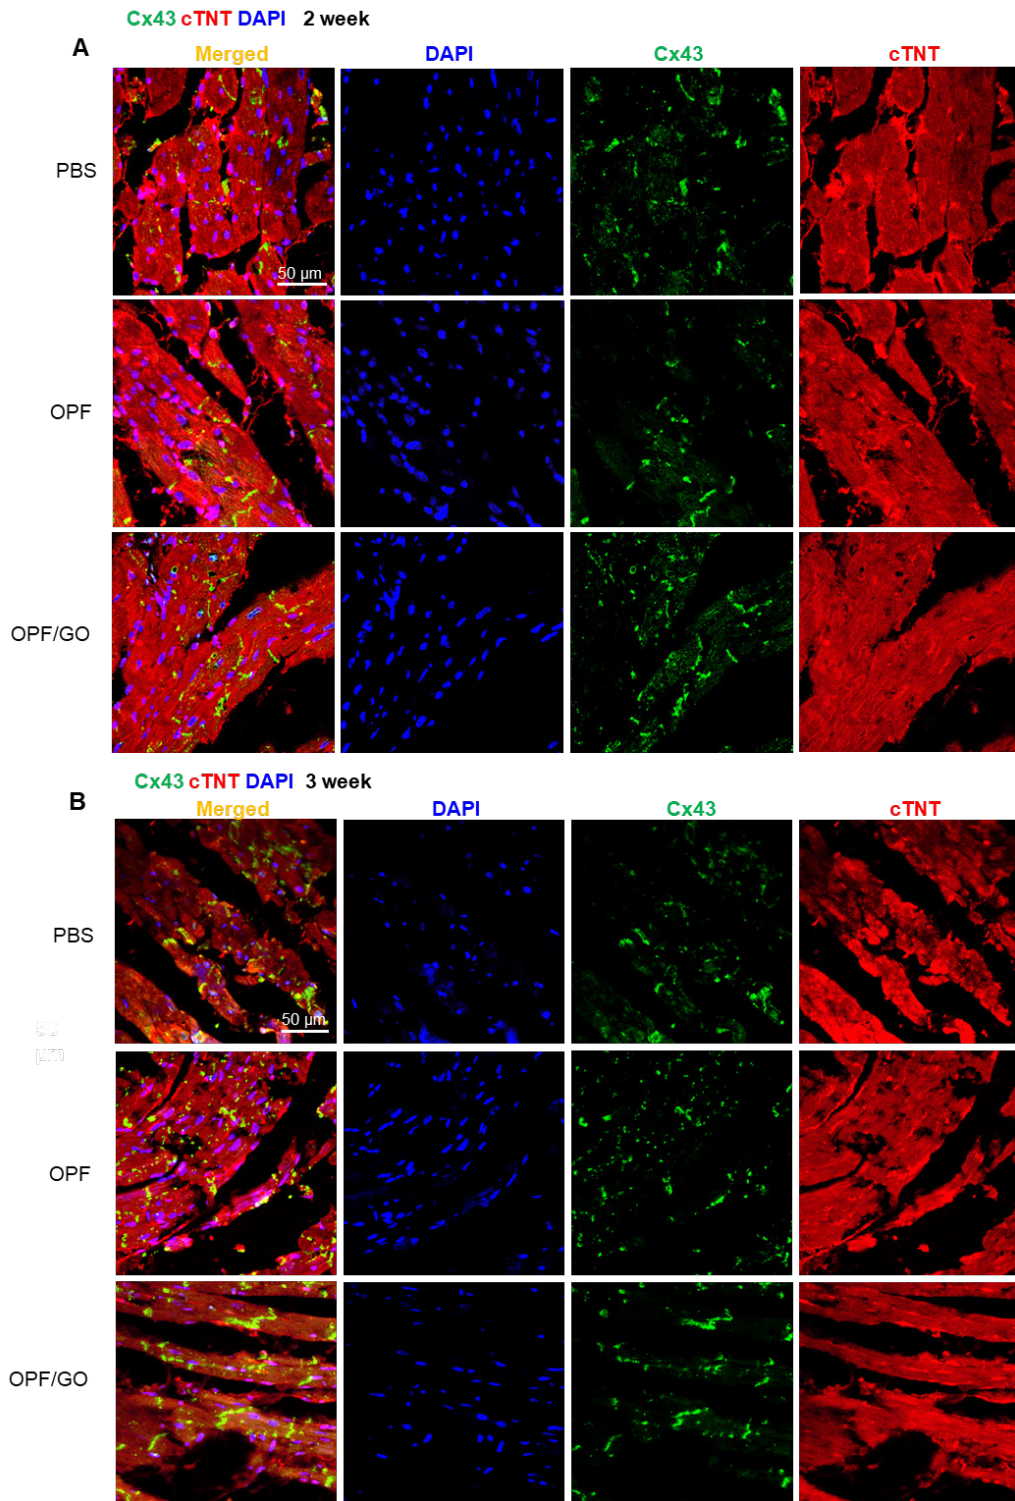

**Figure S4.** The formation of gap junction associated proteins in the infarcted region of PBS, OPF and OPF/GO injected groups at 2 weeks (A) and 3 weeks (B) post MI. The representative fluorescent images show the specific markers of gap junctions and cardiomyocytes (Cx43 (green), cTNT (red), DAPI (blue)).

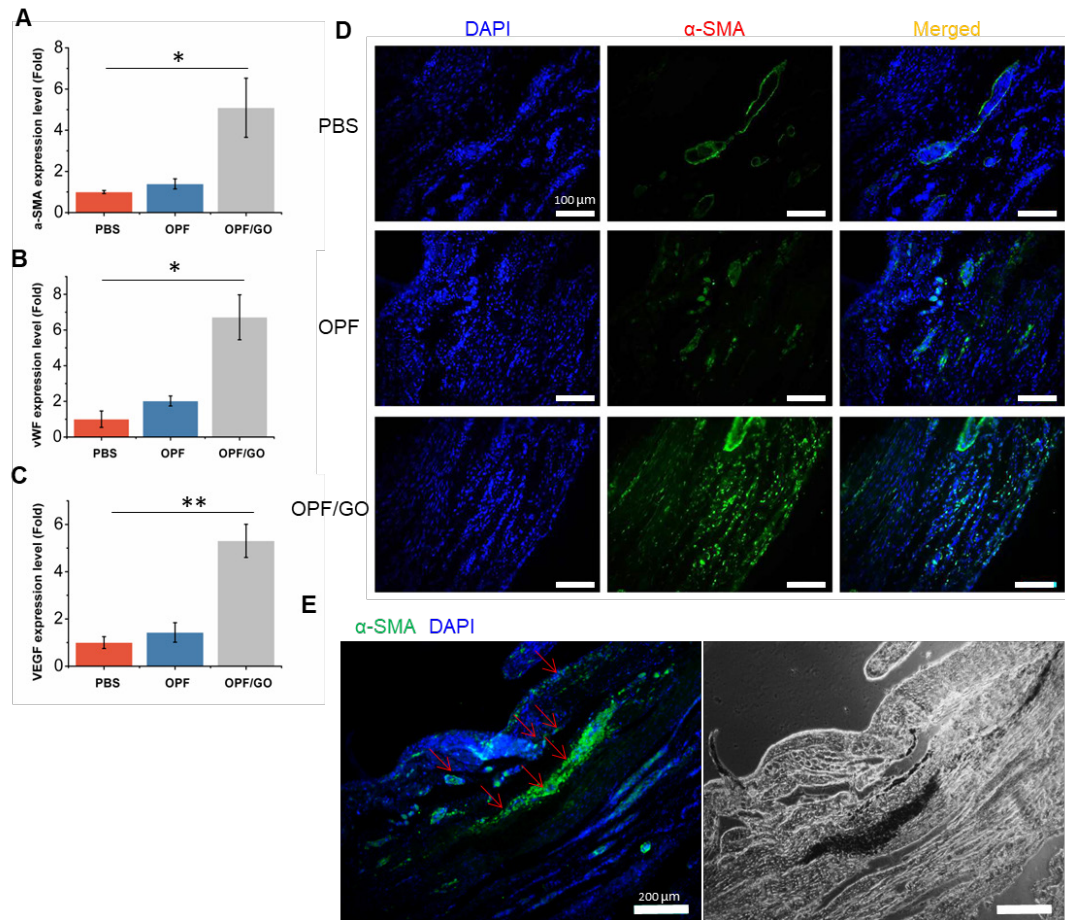

**Figure S5. OPF/GO conductive hydrogel promoted the angiogenesis.**

The mRNA level of  $\alpha$ -SMA (A), vWF (B) and VEGF (C) in PBS, OPF and OPF/GO injected groups 4 weeks after MI. D. Immunofluorescent staining revealed a higher density of  $\alpha$ -SMA positive capillaries in the infarcted region of OPF/GO hydrogel treated group compared to OPF and PBS treated group. E. High magnification images of the undegraded OPF/GO hydrogel appeared to distribute in the anterior wall, cells ingrowth was found inside or around the hydrogel area, with some regions of this tissue structure staining positively for  $\alpha$ -SMA. \* $p < 0.05$ , or \*\* $p < 0.01$ .

## **Movie S1**

***Ex Vivo* Measurement of Skeletomuscular signal propagation through OPF/GO**

## **Movie S2**

***Ex Vivo* Measurement of Skeletomuscular signal propagation through OPF**

## **Movie S3**

**Calcium transients Signal Conduction of isolated cardiomyocytes in the infarcted area of OPF/GO group**

## **Movie S4**

**Calcium transients Signal Conduction of isolated cardiomyocytes in the infarcted area of OPF group**

## **Movie S5**

**Calcium transients Signal Conduction of isolated cardiomyocytes in the infarcted area of PBS group**

**Supplementary Table 1**

|                                   |                         |
|-----------------------------------|-------------------------|
| q-PCR primers for mRNA expression |                         |
| GAPDH Forward                     | AGTTCAACGGCACAGTCAAG    |
| GAPDH Reverse                     | TACTCAGCACCCAGCATCACC   |
| $\alpha$ -SMA Forward             | AGAAGCCCAGCCAGTCGCCATCA |
| $\alpha$ -SMA Reverse             | AGCAAAGCCCGCCTTACAGAGCC |
| VEGF Forward                      | TGAACAGCAGCGTATTCTG     |
| VEGF Reverse                      | GACAGAGCCTTCTTCTTCC     |
| Vwf Forward                       | GCCTGTGGGAGCAGTGCCAG    |
| Vwf Reverse                       | GGGCGTACTCCAGGAGGGCA    |
| Cx37 Forward                      | GGGCGCTCATGGGTACCTAT    |
| Cx37 Reverse                      | GCTCCATGGTCCAGCCATA     |
| Cx40 Forward                      | GCCTTGGTATGTGCCTTTGGA   |
| Cx40 Reverse                      | AGGATGACAGCTGGTGGCAAT   |
| Cx45 Forward                      | AACAAAGCCAATATCGCCCAG   |
| Cx45 Reverse                      | TGCTAGATCCAAGCGTTCCTG   |
| Cx43 Forward                      | AGCAAGCTAGCGAGCAAAAC    |
| Cx43 Reverse                      | GAGTTCATGTCCAGCAGCAA    |
